# Supplementary material for: Lineage-specific RUNX2 super-enhancer activates MYC and promotes the development of blastic plasmacytoid dendritic cell neoplasm
Source: PubMed Central journal article supplement (PMC6458132; doi:10.1038/s41467-019-09710-z), 2019-04-10
Supplement: 41467_2019_9710_MOESM1_ESM.pdf [file 41467_2019_9710_MOESM1_ESM.pdf]

## **Supplementary Information**

Lineage-specific RUNX2 super-enhancer activates MYC and promotes the development of blastic plasmacytoid dendritic cell neoplasm

Kubota et al.

**Supplementary Figure 1-16**

**Supplementary Table 1-2**

## Supplementary Figure 1

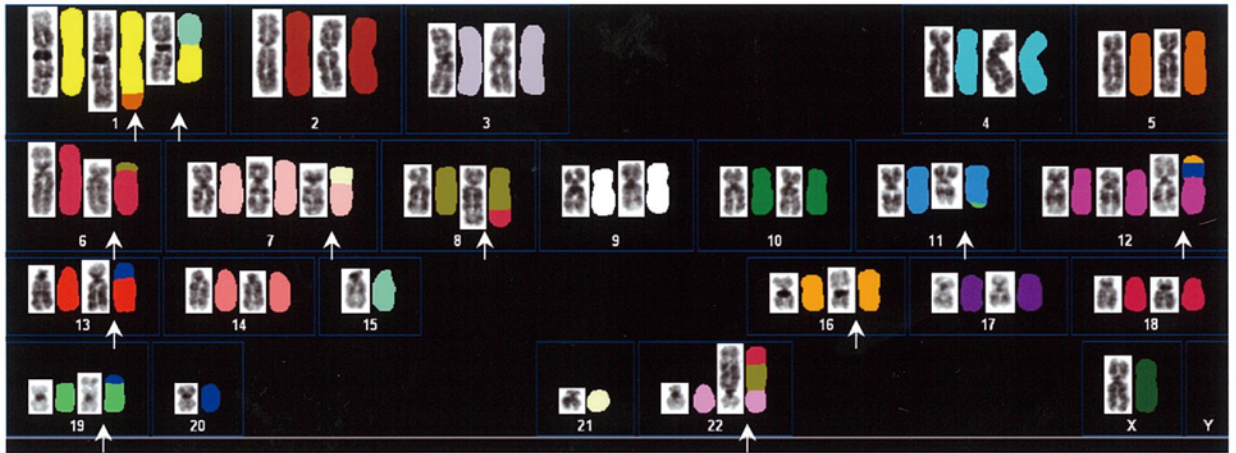

**Supplementary Figure 1.** Spectral Karyotyping (SKY) analysis of CAL-1 cells. CAL-1 cells harbored chromosomal anomalies of t(6;8) and derivative(22) containing a duplication of the long arm of der(8) identified by SKY.

Supplementary Figure 2

CAL-1

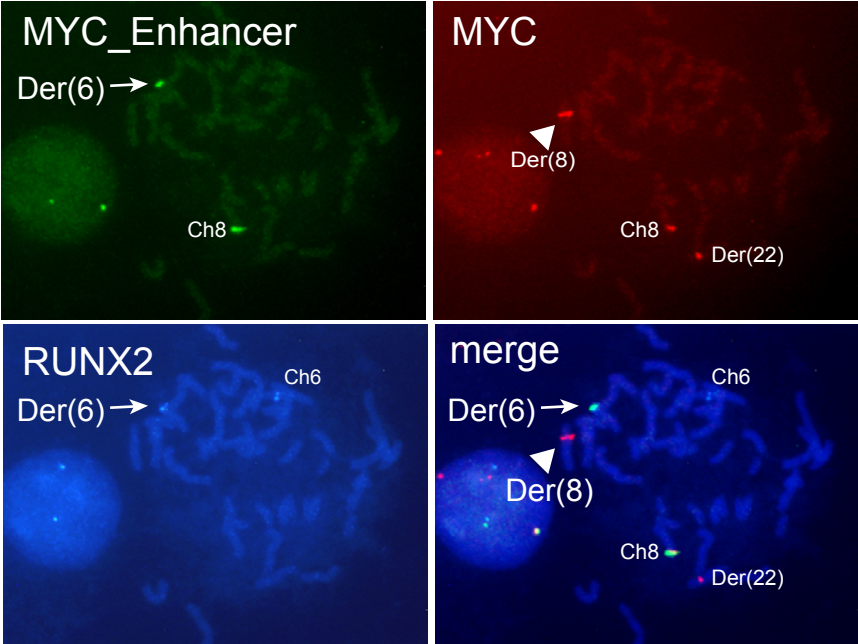

Patient #2

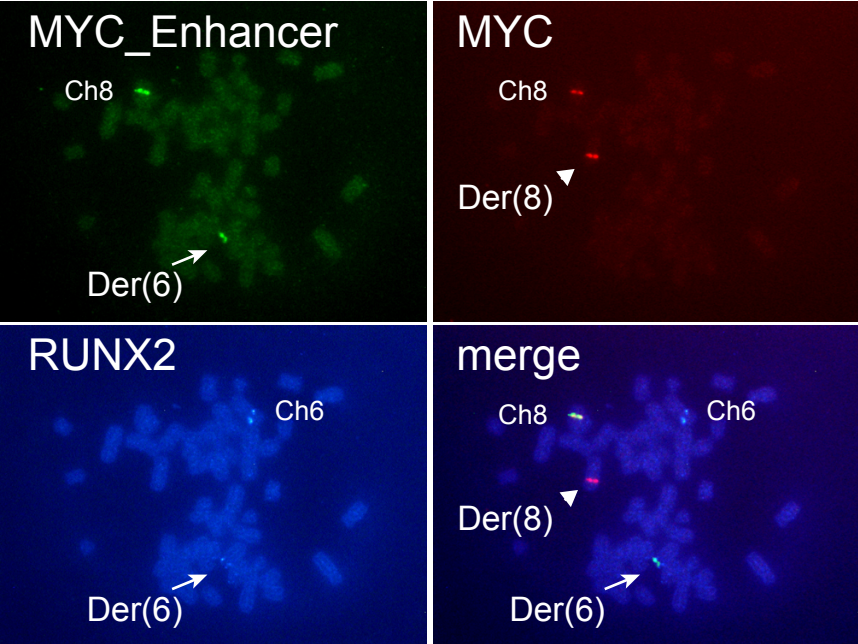

**Supplementary Figure 2.** Metaphase FISH analysis of BPDCN cells. We found a merged signal of RUNX2 and the enhancer region of MYC on Der(6) and single signals of the MYC on Der(8) and Der(22) in CAL-1 and that on Der(8) in a patient (#2).

# Supplementary Figure 3

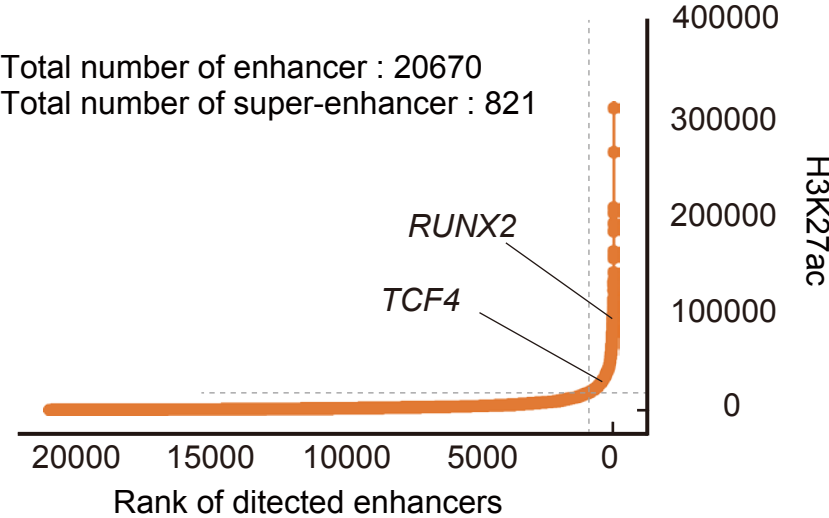

**Supplementary Figure 3.** Super enhancers of RUNX2 and TCF4 identified by a ROSE analysis for H3K27ac-ChIP sequencing in CAL-1 cells

# Supplementary Figure 4

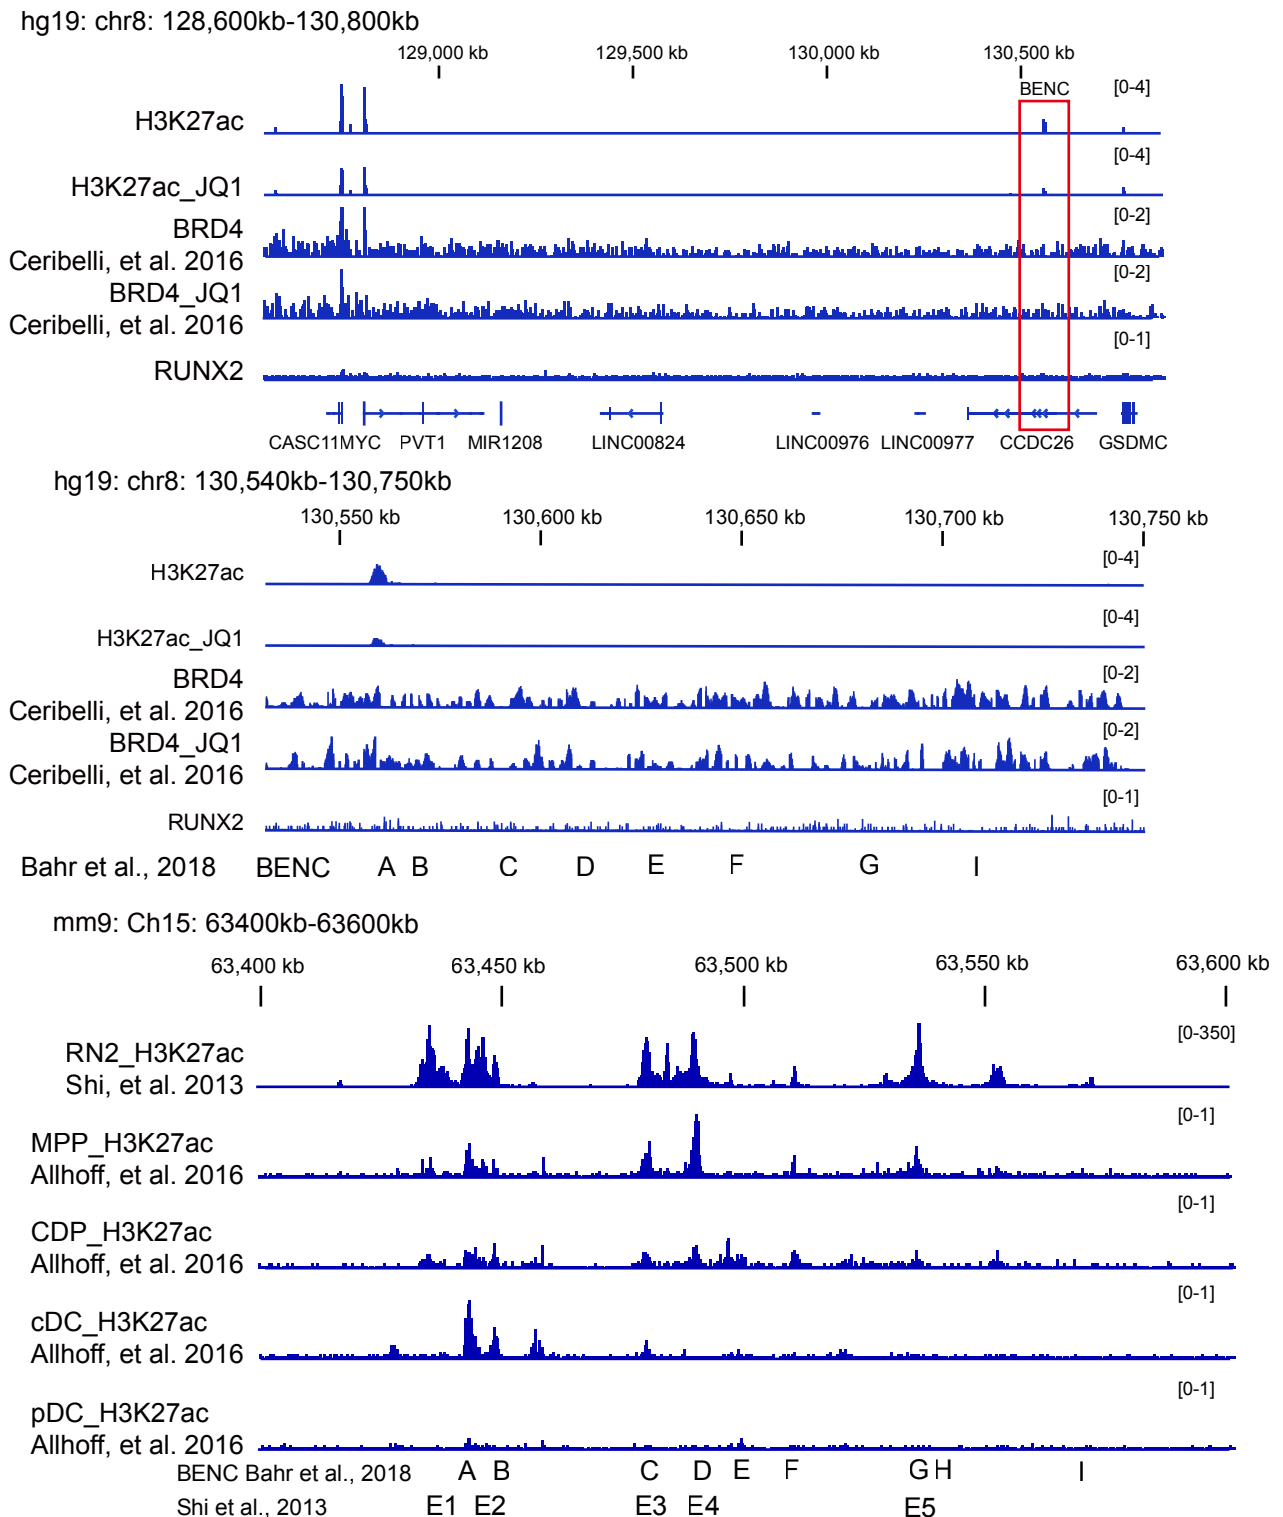

**Supplementary Figure 4.** Human BPDCN CAL-1 cells showing a small and isolated enhancer of MYC (hg19: chr8; 130558kb-130561kb) defined by ChIP sequencing utilizing either an anti-H3K27ac in this study or anti-BRD4 antibody with or without JQ1 treatment<sup>12</sup> and low enrichments of RUNX2 in the BENC (upper and middle panels), and murine cells showing the BENC enhancer of MYC (mm9: chr15; 63400kb-63600kb) defined by H3K27ac ChIP-sequencing performed on MPPs, CDPs, cDCs, pDCs, and RN2 AML cells (lower panel)<sup>30 31</sup>

## Supplementary Figure 5

mm9: Ch17: 44700kb-45500kb

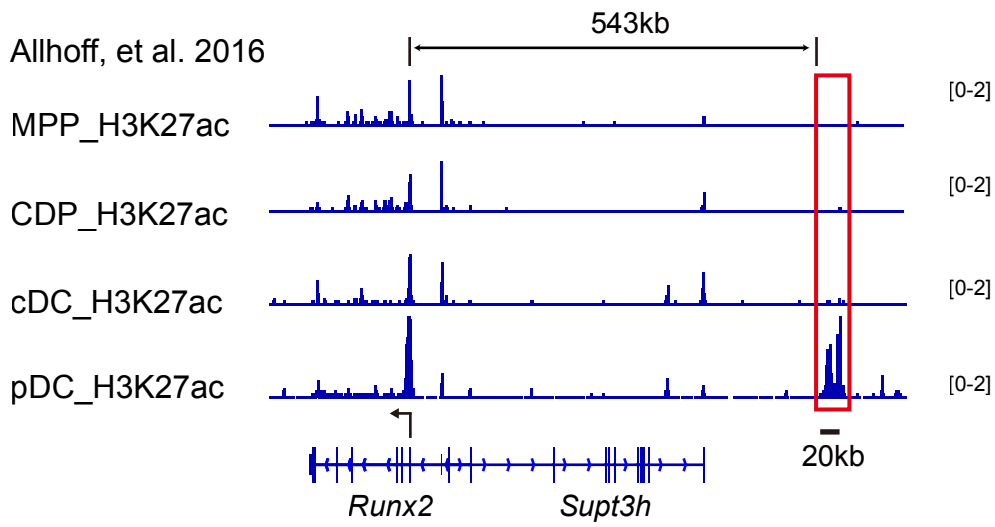

**Supplementary Figure 5.** Murine pDCs showing a long and clustered enhancer of *Runx2* defined by H3K27ac-ChIP sequencing data performed on murine MPP, CDP, cDC, and pDC cells <sup>31</sup>

## Supplementary Figure 6

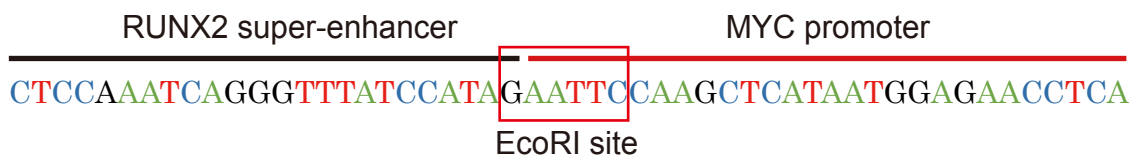

**Supplementary Figure 6.** Identification of association between the RUNX2 super-enhancer and the MYC promoter in CAL-1 cells

## Supplementary Figure 7

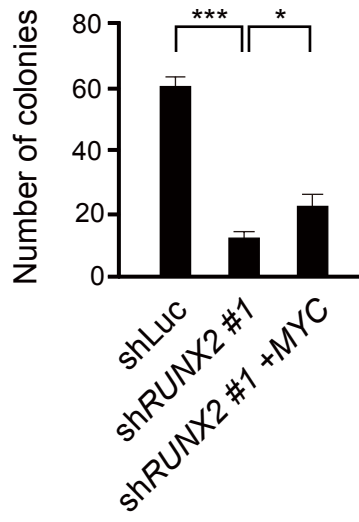

**Supplementary Figure 7.** Ectopic expression of MYC rescuing the reduced colony formation capacity in RUNX2 KD CAL-1 cells



# Supplementary Figure 8

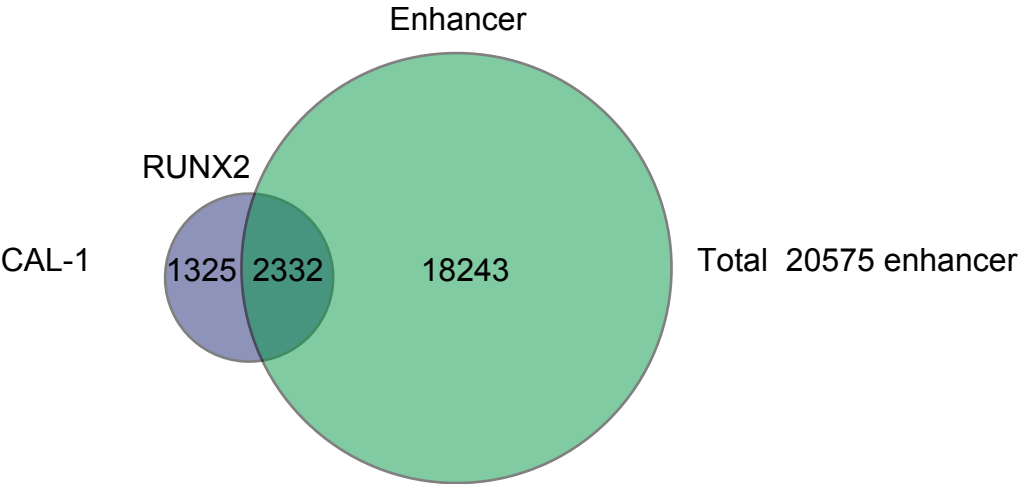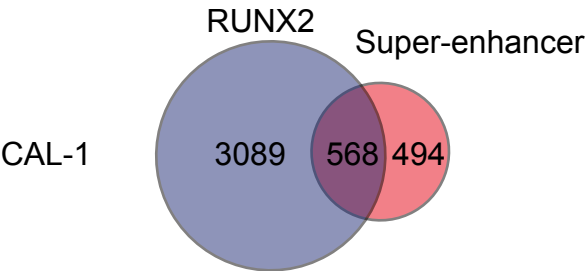

**Supplementary Figure 8.** Venn diagrams showing the overlaps between RUNX2 binding regions and enhancers or super-enhancers in CAL-1 cells

## Supplementary Figure 9

| Enhancers |                                                                                   |                            | Super-enhancers |                                                                                   |                         |
|-----------|-----------------------------------------------------------------------------------|----------------------------|-----------------|-----------------------------------------------------------------------------------|-------------------------|
| Rank      | Motif                                                                             | Best Match                 | Rank            | Motif                                                                             | Best Match              |
| 1         |  | PU.1/IRF8<br>$p=10^{-76}$  | 1               |  | SOX17<br>$p=10^{-10}$   |
| 2         |  | NRF2<br>$p=10^{-45}$       | 2               |  | SREBP1A<br>$p=10^{-10}$ |
| 3         |  | SPDEF<br>$p=10^{-29}$      | 3               |  | Sox6<br>$p=10^{-9}$     |
| 4         |  | SPI1(PU.1)<br>$p=10^{-25}$ | 4               |  | MED-1<br>$p=10^{-8}$    |
| 5         |  | Sp100<br>$p=10^{-25}$      | 5               |  | RUNX2<br>$p=10^{-8}$    |

**Supplementary Figure 9.** Significant enrichment of the RUNX2-binding sequence motif within super-enhancers rather than enhancers in CAL-1 cells

## Supplementary Figure 10

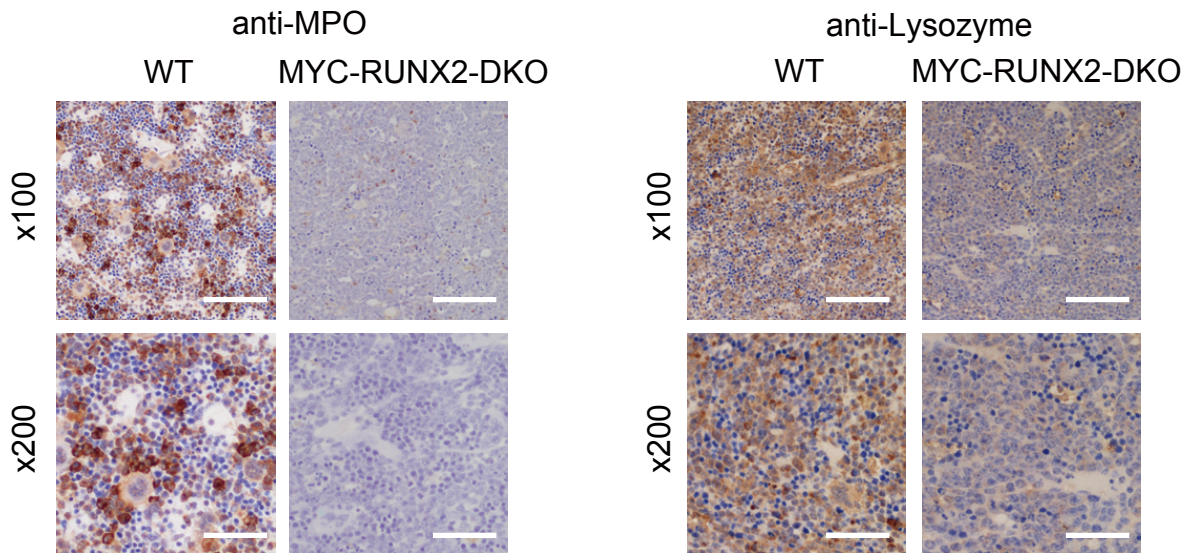

**Supplementary Figure 10.** Representative histology of the bone marrow tissues of WT and MYC+RUNX2-DKO BPDCN mouse stained with an anti-myeloperoxidase antibody or an anti-lysozyme antibody. Scar bars, 50 $\mu$ m or 100 $\mu$ m.

## Supplementary Figure 11

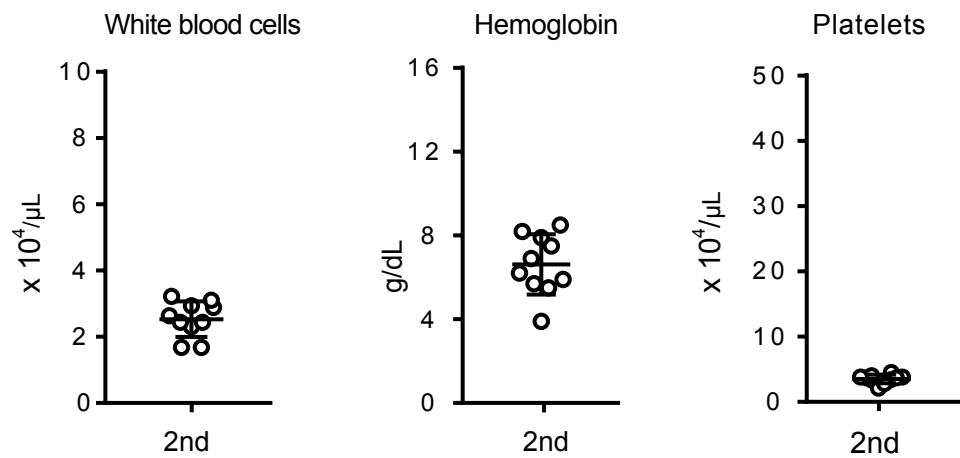

**Supplementary Figure 11.** Complete blood counts of the secondary-transplanted mice with MYC+RUNX2-DKO cells (n=10). Bars show the mean  $\pm$  SD and data were combined from 2 independent experiments.

## Supplementary Figure 12

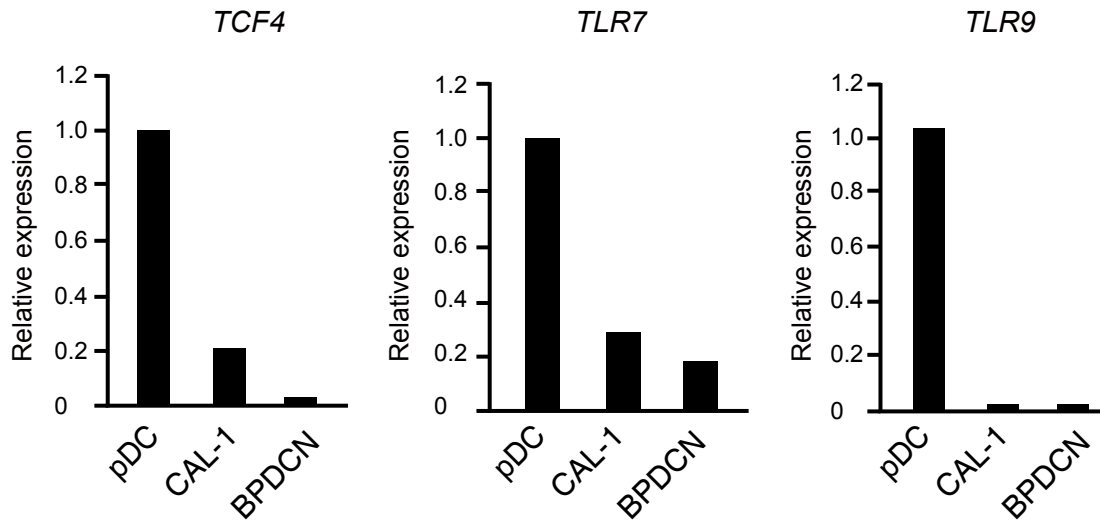

**Supplementary Figure 12.** Primary BPDCN cells and CAL-1 cells showing lower expression levels of pDC-signature genes such as TCF4, TLR7, and TLR9 than normal pDCs in humans (GSE62014)

## Supplementary Figure 13

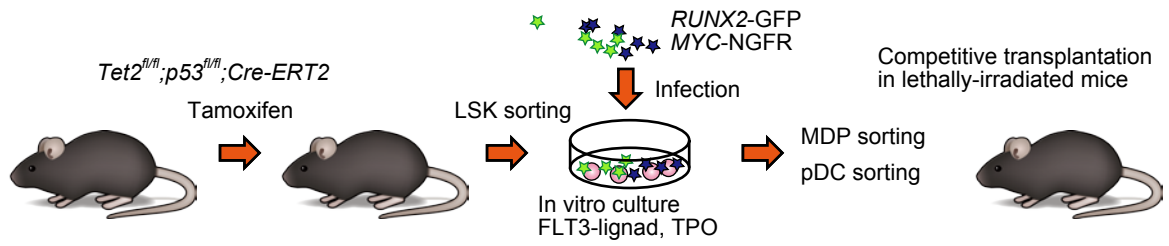

**Supplementary Figure 13.** Experimental scheme of transplantation of purified MDPs and pDCs from MYC+RUNX2-DKO cells

## Supplementary Figure 14

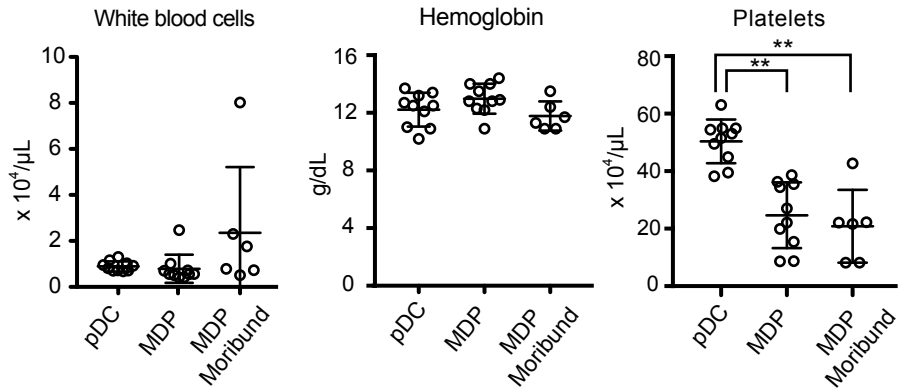

**Supplementary Figure 14.** Complete blood cell counts of MYC+RUNX2-DKO pDCs (n=10) and MYC+RUNX2-DKO MDPs (n=10) mice 3 weeks after transplantation and moribund MDP leukemic mice (n=6) at the time of sacrifice. Bars show the mean  $\pm$  SD.

## Supplementary Figure 15

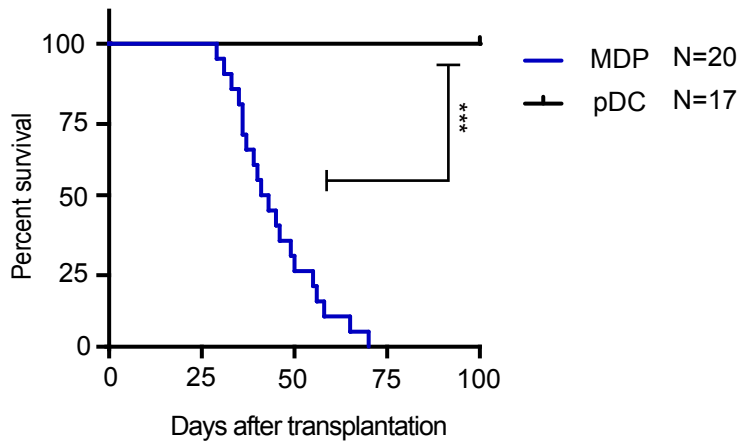

**Supplementary Figure 15.** Significantly shorter median survival of MYC+RUNX2-DKO MDPs mice (n=20) (42 days versus undetermined for MYC+RUNX2-DKO pDCs mice (n=17); \*\*\*p<0.0001 by the Log-rank test). Data were combined from 2 independent experiments.



Supplementary Figure 16

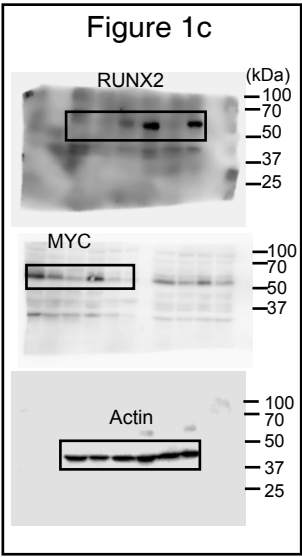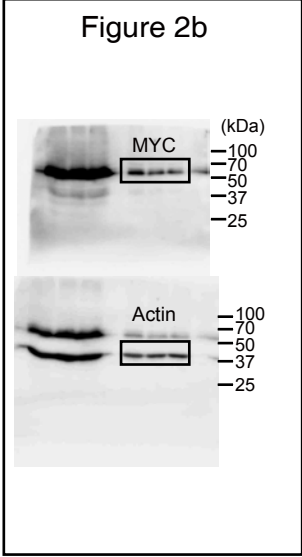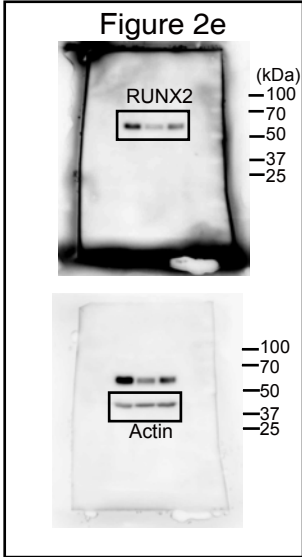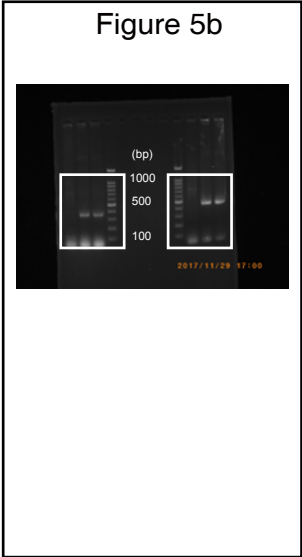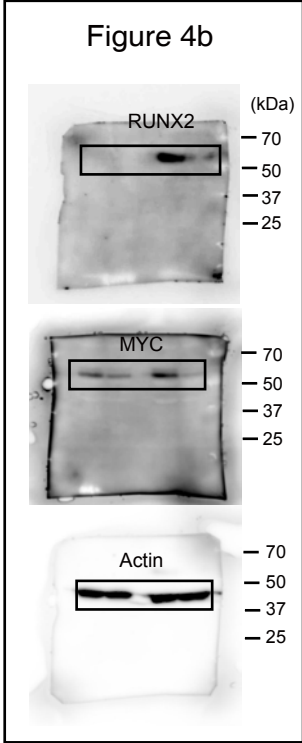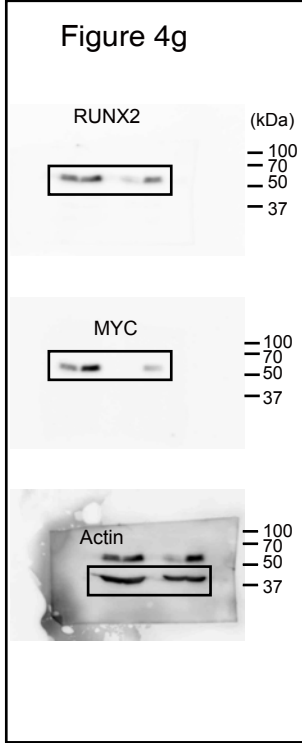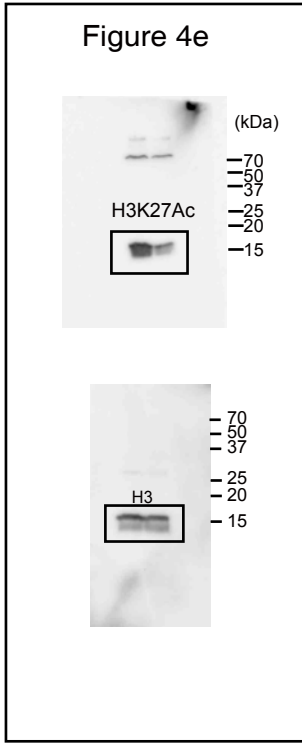

Supplementary Figure 16. Original images of gels and blots

## Supplementary Table 1

| Sample<br>Gene set            | BPDCN<br>versus<br>LMPPs | BPDCN<br>versus<br>GMPs | BPDCN<br>versus<br>MDPs | BPDCN<br>versus<br>pDCs |
|-------------------------------|--------------------------|-------------------------|-------------------------|-------------------------|
| MYC_target_v1                 | NES=3.176<br>FDR=0.000   | NES=2.815<br>FDR=0.000  | NES=2.490<br>FDR=0.000  | NES=2.490<br>FDR=0.000  |
| pDC-signature-gene            | NES=1.677<br>FDR=0.000   | NES=1.175<br>FDR=0.000  | NES=2.353<br>FDR=0.000  | NES=-2.928<br>FDR=0.000 |
| Inflammatory_response         | NES=-1.607<br>FDR=0.000  | NES=-1.841<br>FDR=0.000 | NES=-1.749<br>FDR=0.000 | NES=-2.065<br>FDR=0.000 |
| Interferon $\alpha$ _response | NES=-1.759<br>FDR=0.000  | NES=-1.558<br>FDR=0.006 | NES=-1.528<br>FDR=0.000 | NES=-2.088<br>FDR=0.000 |

**Supplementary Table 1.** GSEA plots for Hallmark MYC targets V1, pDC-signature genes, Hallmark inflammatory response and Hallmarks interferon  $\alpha$  response comparing MYC+RUNX2-DKO leukemic cells to LMPPs, MDPs, GMPs, and pDCs isolated from wild-type mice. Normalized enrichment score (NES) and false discovery rate (FDR) q-values are indicated.

## Supplementary Table 2

| q-PCR    | 5'- sequence -3'             |
|----------|------------------------------|
| RUNX2-F  | TCCCTGAACTCTGCACCAAG         |
| RUNX2-R  | ATCTGGCTCAGGTAGGAGGG         |
| MYC-F    | AATGAAAAGGCCCCCAAGGTAGTTATCC |
| MYC-R    | GTCGTTTCCGCAACAAGTCCTCTTC    |
| TCF4-F   | ACCAACAGCGAATGGCTGCCTTA      |
| TCF4-R   | TCCCCTGCTCACAGGAGGTGAA       |
| TLR9-F   | GGGACCTCGAGTGTGAAGCATCC      |
| TLR9-R   | CATGATGGCCTGCACCAGGAGAG      |
| TLR7-F   | TGCTCTGCTCTCTTCAACCAGACC     |
| TLR7-R   | ACCATCTAGCCCCAAGGAGTTTGG     |
| IL3-RA-F | CCCCATCGGTGACAGCTTCCAAA      |
| IL3-RA-R | CACAAGCCCTGAACCCAGTCTC       |

| 3C-qPCR                  | 5'- sequence -3'          |
|--------------------------|---------------------------|
| RUNX2-promoter           | CTGTCACACTGAGCTTGACACCGC  |
| RUNX2-super-enhancer     | GCATATTTAACACAGTGCAACAGCC |
| MYC-promoter             | CCATGGTCCAAAATGAGGTTCTCC  |
| RUNX2-super-enhancer-seq | CTTGCTACGACCTTTGGTGTCC    |
| MYC-promoter-seq         | GGTTGAGAATCCCTGGGTTCACTCC |

| sgRNA  | 5'- sequence -3'        |
|--------|-------------------------|
| sgRNA1 | TTCTGCGTCGTTACGCTGGGGG  |
| sgRNA2 | TAGCTGCTGGCGATCCAGCAGGG |
| sgRNA3 | TCAGTAGACGTTGAACTGGACGG |

| Genomic PCR           | 5'- sequence -3'          |
|-----------------------|---------------------------|
| check-deletion-gRNA#1 | GTGTGCTGTTTGCTAAGACTGCTGG |
| check-deletion-gRNA#2 | CTTAGCACAGAGGAATAAGCCC    |
| check-deletion-gRNA#3 | CCTTCTAGGGTCCATGAGTAACCC  |

**Supplementary Table 2.** List of primers for genomic PCR and quantitative RT-PCR
