# Supplementary material for: Lineage-specific RUNX2 super-enhancer activates MYC and promotes the development of blastic plasmacytoid dendritic cell neoplasm
Source: PubMed Central journal article supplement (PMC6458132; doi:10.1038/s41467-019-09710-z), 2019-04-10
Supplement: 41467_2019_9710_MOESM3_ESM.pdf [file 41467_2019_9710_MOESM3_ESM.pdf]

## **Description of Additional Supplementary Files**

File Name: Supplementary Data 1

Description: List of up-regulated genes and down-regulated genes in RUNX2 KD-CAL-1 cells

File Name: Supplementary Data 2

Description: List of up-regulated genes and down-regulated genes in BPDCN cells versus normal pDCs in humans and mice
